# Supplementary material for: Multicompartment-like aggregates formed by a redox-responsive surfactant encapsulated polyoxometalate in DMF/butanol mixed solvent
Source: Royal Society of Chemistry journal article supplement (doi:10.1039/c7ra00654c), 2017-01-01
Supplement: c7ra00654c1.pdf [file c7ra00654c1.pdf]

## Supplementary Information

### **Multicompartment-like aggregates formed by a redox-responsive surfactant encapsulated polyoxometalate in DMF/Butanol mixed solvent**

Na Li, Sijing Yi, Zhaohong Qian, Jiao Wang, Nana Lei, Xiao Chen\*

Key Laboratory of Colloid and Interface Chemistry, Shandong University, Ministry of Education,  
Jinan, 250100, China

**\*Corresponding author: Xiao Chen**

**Address:** Key Laboratory of Colloid and Interface Chemistry, Shandong University, Ministry of  
Education, Jinan, 250100, China

**E-mail:** xchen@sdu.edu.cn.

**Tel.:** +86-531-88365420.

**Fax:** +86-531-88564464.

## 1. Elemental Analysis

Anal. Calc. for SEC ( $C_{132}H_{204}N_3Fe_6O_{40}W_{12}P$ , 5045.54): C 31.01%, H 3.99%, N 0.80%. Found: C 31.41%, H 4.05%, N 0.83%.

## 2. Sample Appearance Pictures

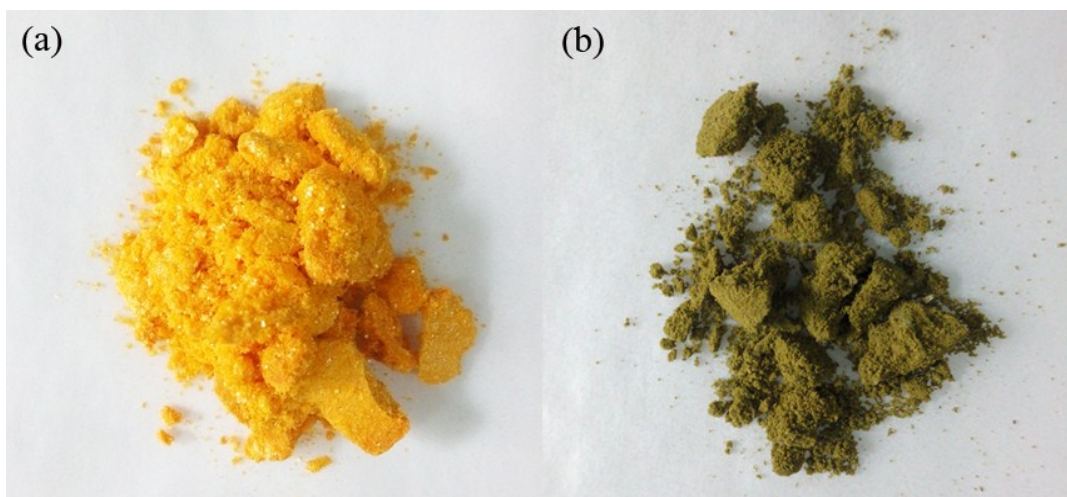

Fig. S1 Appearance pictures of yellow BFDMA (a) and greyish-green SEC (b).

## 3. FTIR Spectra

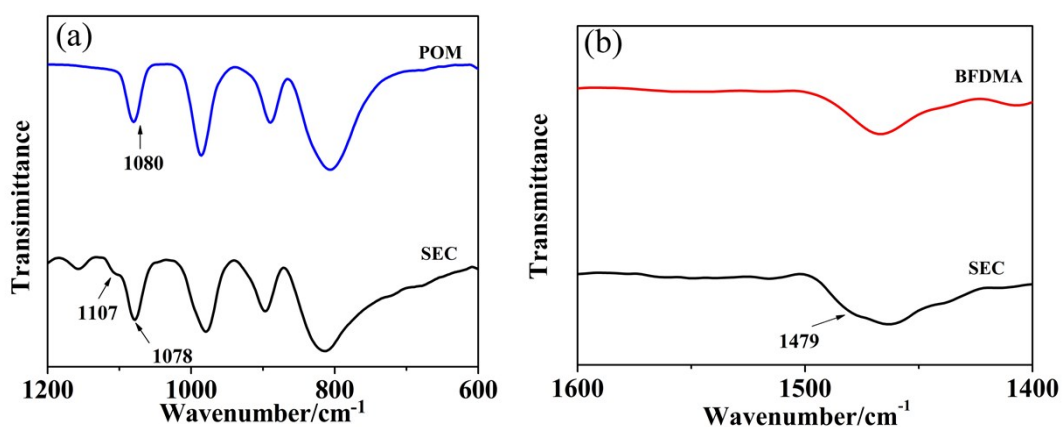

Fig. S2 Magnified FT-IR spectra around 1000  $cm^{-1}$  (a) and 1400  $cm^{-1}$  (b).

#### 4. TEM Image and Size Distribution.

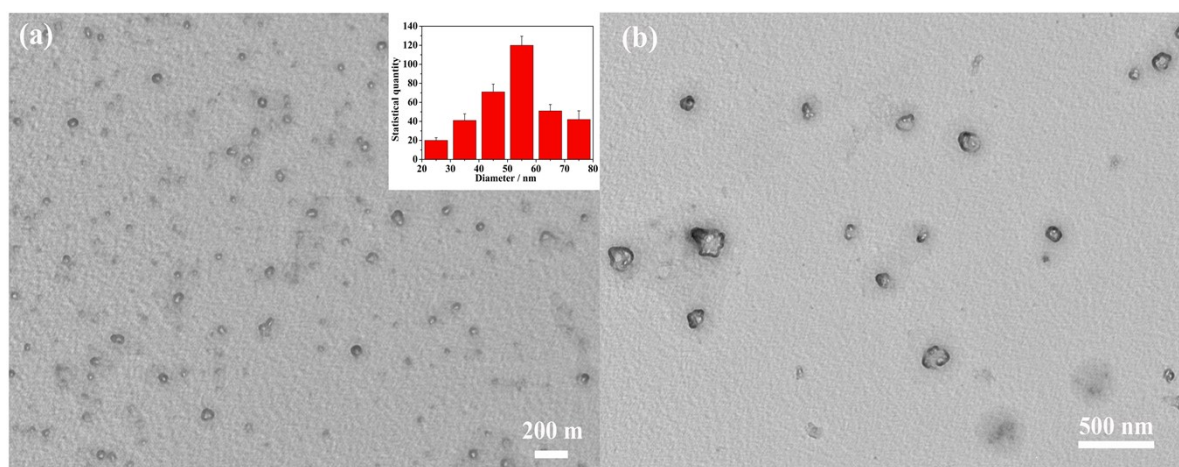

**Fig. S3** TEM images of SEC spherical aggregates with an inset of size distribution statistics (a) and SEC multicompartment-like aggregates (b).

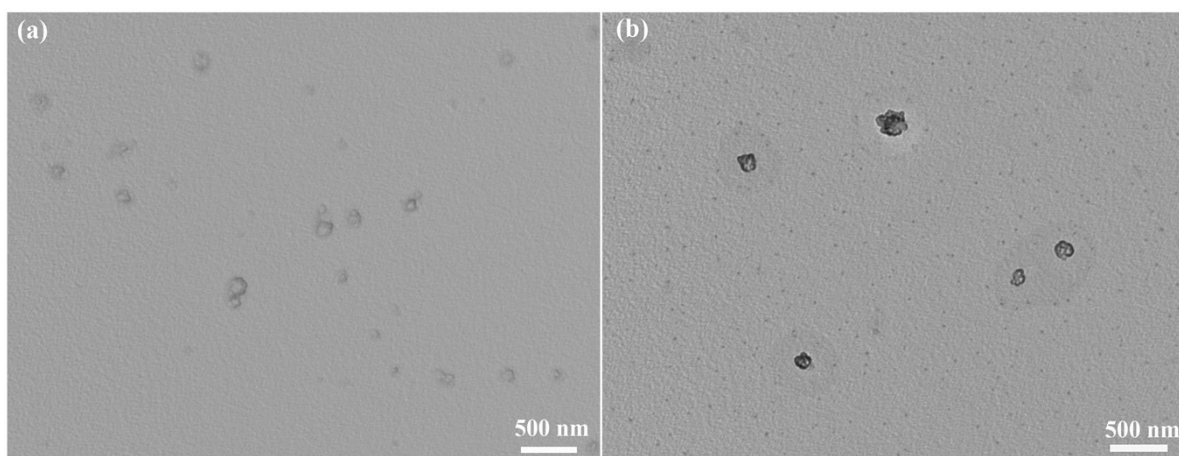

**Fig. S4** TEM images of multicompartment-like aggregates: (a) initially formed; (b) re-reduced.
